# Supplementary material for: Influence of surfactants of different nature and chain length on the morphology, thermal stability and sheet resistance of graphene
Source: Royal Society of Chemistry journal article supplement (doi:10.1039/c8sm01017j), 2018-01-01
Supplement: c8sm01017j1.pdf [file c8sm01017j1.pdf]

## Electronic Supplementary Information

### Influence of surfactants of different nature and chain length on the morphology, thermal stability and sheet resistance of graphene

Ana M. Díez-Pascual,<sup>\*a</sup> Cristina Vallés,<sup>b</sup> Rocío Mateos,<sup>a</sup> Soledad Vera-López,<sup>a</sup> Ian A. Kinloch,<sup>b</sup> and María Paz San Andrés<sup>a</sup>

<sup>a</sup>Analytical Chemistry, Physical Chemistry and Chemical Engineering Department, Faculty of Biology, Environmental Sciences and Chemistry, Alcalá University, E-28871 Alcalá de Henares, Madrid, Spain.

<sup>b</sup>National Graphene Institute and School of Materials, University of Manchester, Oxford Road, Manchester M13 9PL, UK

\*Corresponding author. [am.diez@uah.es](mailto:am.diez@uah.es) (A. M. Díez-Pascual)

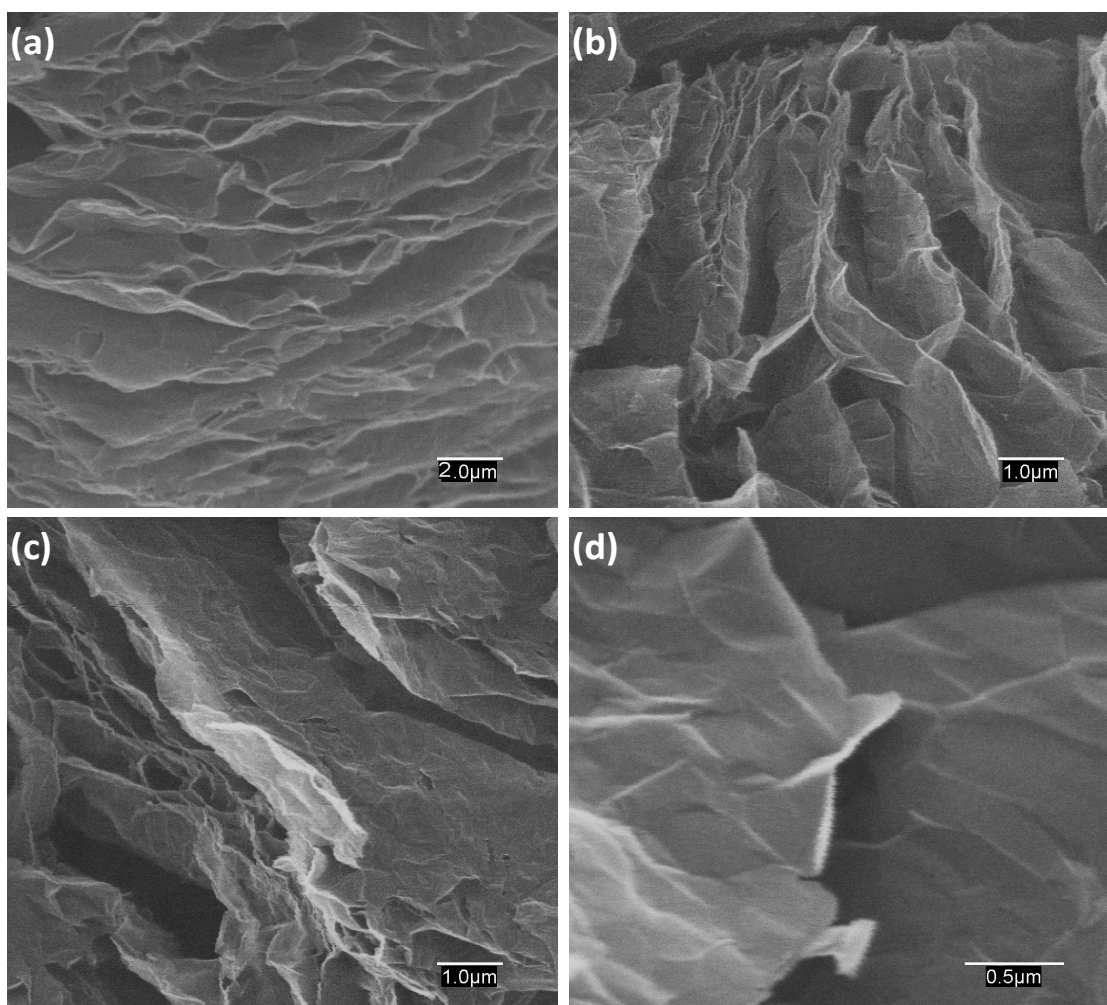

**Fig. S1.** SEM images of raw G at different magnifications.

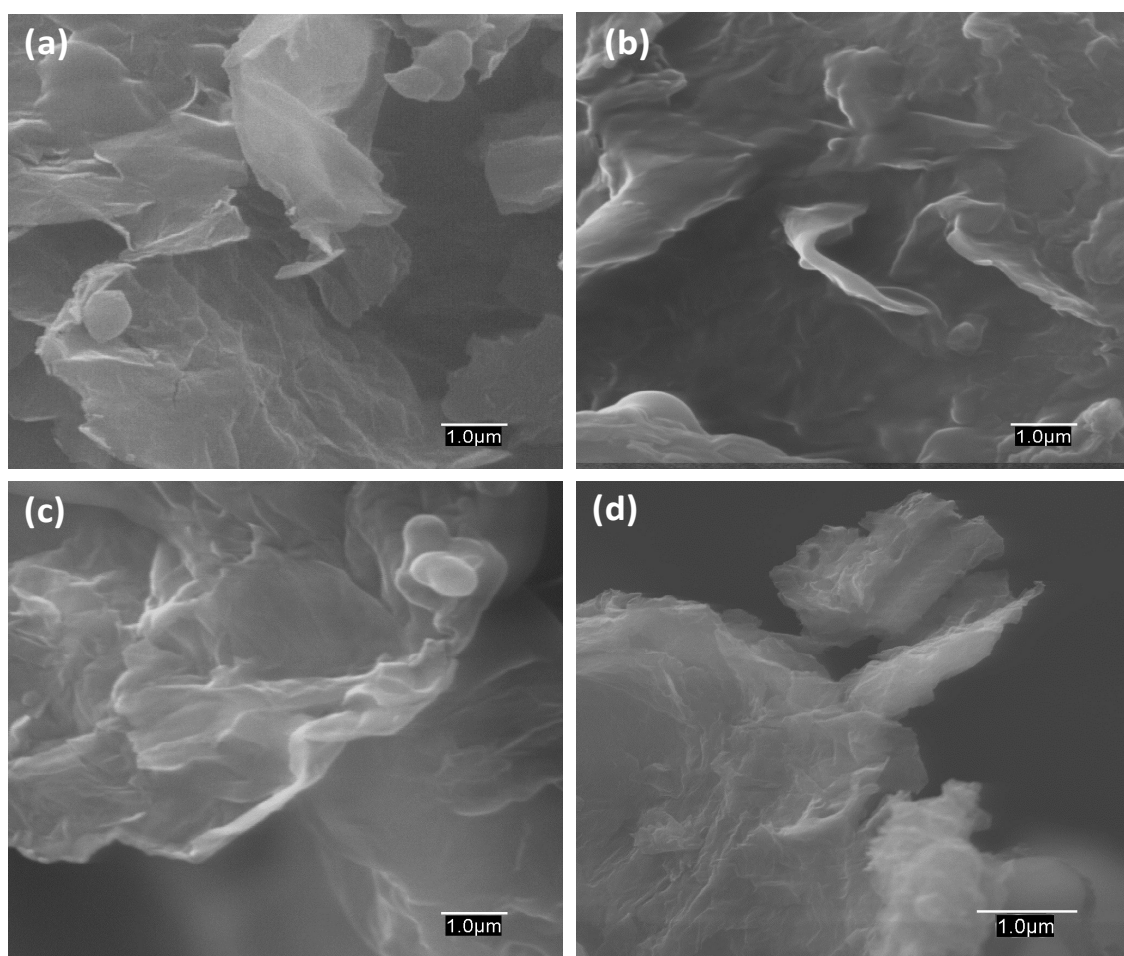

**Fig. S2.** SEM images of G (1.0 wt%) dispersions in 20 mM SDS (a), 30 mM DTAB (b), 20 mM CTAB (c) and 10 mM Brij L23 (d).

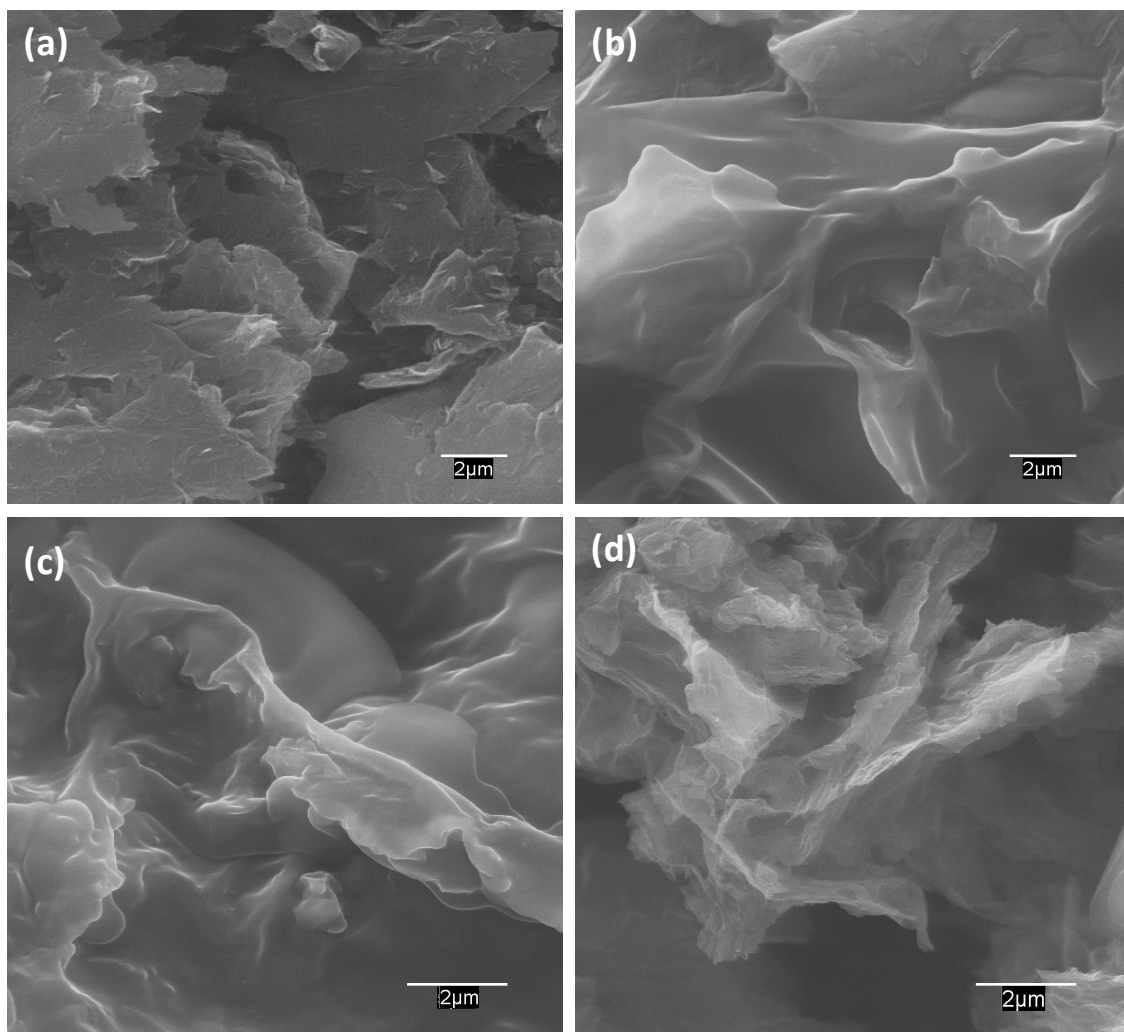

**Fig. S3.** SEM images of G (0.5 wt%) dispersions in 20 mM SDS (a), 30 mM DTAB (b), 20 mM CTAB (c) and 10 mM Brij L23 (d).
